# Supplementary material
Source: PubMed Central journal article supplement (PMC9792890)

Supplement Figure 1

A

HeLa Ohio cells, 2 g/L glucose

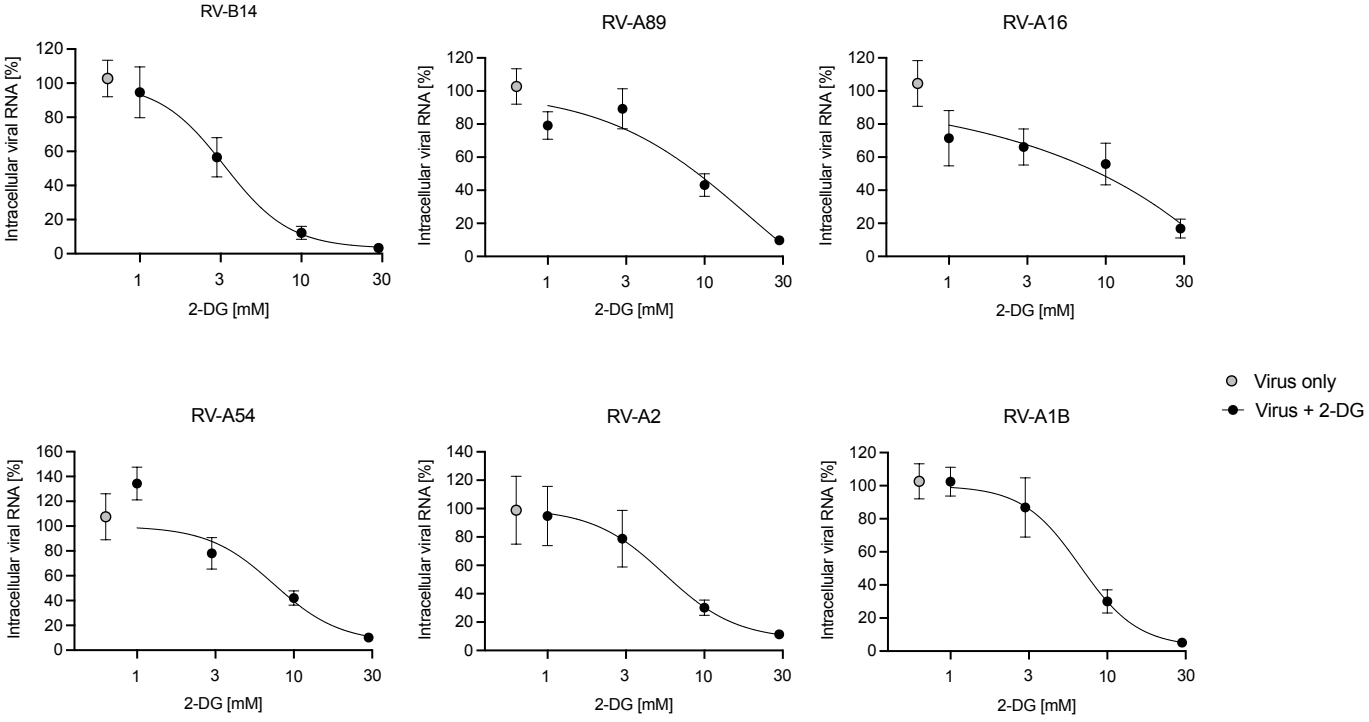

Supplement: mmc1.pdf [file mmc1.pdf]
