# Supplementary material
Source: PubMed Central journal article supplement (PMC9792890)
Supplement: mmc2.pdf [file mmc2.pdf]

## Supplementary Table1: Materials

### Cell lines, cell culture medium and virus stocks

| Item                                       | Company                   | Cat.No.                | Additional Information                                                                                                                                                                |
|--------------------------------------------|---------------------------|------------------------|---------------------------------------------------------------------------------------------------------------------------------------------------------------------------------------|
| MRC-5 cells                                | ATCC                      | CCL-171                |                                                                                                                                                                                       |
| LLC-MK2 cells                              | ATCC                      | CCL-7                  | Amsterdam UMC                                                                                                                                                                         |
| Vero cells                                 | ATCC                      | CCL-81                 | sourced from ECACC (84,113,001)                                                                                                                                                       |
| Human nasal epithelial cells (HNECs)       | Epithelix Sàrl            | EP51AB                 | Donor no. AB0630.01                                                                                                                                                                   |
| HeLa Ohio cells                            | ECACC                     | 14J003                 |                                                                                                                                                                                       |
| MRC-5 cell culture media                   | Gibco – Life Technologies | 31095                  | Eagle-MEM supplemented with 10 % FBS, L-glutamine (2 mM), non-1x essential amino acids solution, 1 mM sodium pyruvate, 100 mg/mL Gentamycin sulfate and 0.15 % sodium bicarbonate.    |
| LLC-MK2 cell culture media                 | Gibco – Life Technologies | 31095                  | Eagle-MEM supplemented with 10 % FBS, 1x non-essential amino acids solution, 100 mg/mL Gentamycin sulfate and 25 mM HEPES.                                                            |
| Vero cell culture media                    | Takeda Inhouse            |                        | TC-Vero medium supplemented with 5 % FBS, 2 mM L-glutamine, 1x non-essential amino acids solution, 1 mM sodium pyruvate, 100 mg/mL Gentamycin sulfate and 0.075 % sodium bicarbonate. |
| Human nasal epithelial cell culture medium | STEMCELL Technologies     | 05041, 07925, 15140122 | PneumaCult™-Ex Plus Basal Medium supplemented with 1x PneumaCult™-Ex Plus Supplement, 0.1 % Hydrocortisone Stock Solution and 1 % Penicillin/Streptomycin (100 Units/ml).             |
| HeLa Ohio cell                             | Gibco                     | 21875034,              | RPMI 1640 medium supplemented                                                                                                                                                         |

|                                                   |                                                                                                |            |                                                                                                                                  |
|---------------------------------------------------|------------------------------------------------------------------------------------------------|------------|----------------------------------------------------------------------------------------------------------------------------------|
| culture medium                                    |                                                                                                | 11879020   | with 10 % FBS, 1 % Penicillin/Streptomycin (100 Units/ml) and 2 mM L-glutamine.                                                  |
| Glucose-free medium                               | Gibco                                                                                          | 11879020   | RPMI 1640 medium without glucose containing 10 % FBS, 1 % Penicillin/Streptomycin (100 Units/ml) and 2 mM L-glutamine.           |
| TCID <sub>50</sub> medium                         | Gibco                                                                                          |            | MEM-EARLES supplemented with 2 % FBS, 1 % Penicillin/Streptomycin (100 Units/ml), 2 mM L-glutamine and 30 mM MgCl <sub>2</sub> . |
| HCoV-229E                                         | ATCC                                                                                           | VR-740     | Rockville, MD                                                                                                                    |
| HCoV-NL63                                         | Lia van der Hoeck/<br>Laboratory of<br>Experimental<br>Virology Dep<br>Medical<br>Microbiology |            | Amsterdam UMC                                                                                                                    |
| SARS-CoV-2 strain<br>BetaCoV/Germany/BavPat1/2020 | EVAg                                                                                           | 026V-03883 | provided by the Charité Universitätsmedizin, Institute of Virology, Berlin, Germany                                              |
| HRV-A54                                           | ATCC                                                                                           | VR1661     | Prepared by Irene Gösler, Blaas group (MPL, Vienna, Austria)                                                                     |
| HRV-B14                                           | ATCC                                                                                           | VR284      | Prepared by Irene Gösler, Blaas group (MPL, Vienna, Austria)                                                                     |
| HRV-A1B                                           | ATCC                                                                                           | VR1645     | Prepared by Irene Gösler, Blaas group (MPL, Vienna, Austria)                                                                     |
| HRV-A2                                            | ATCC                                                                                           | VR482      | Prepared by Irene Gösler, Blaas group (MPL, Vienna, Austria)                                                                     |
| HRV-A89                                           | ATCC                                                                                           | VR1199     | Prepared by Irene Gösler, Blaas group (MPL, Vienna, Austria)                                                                     |
| HRV-A16                                           | ATCC                                                                                           | VR283      | Prepared by Irene Gösler, Blaas group (MPL, Vienna, Austria)                                                                     |

### Chemicals, equipments, reagents and softwares

| Item                                        | Company                  | Cat.No.              |
|---------------------------------------------|--------------------------|----------------------|
| PBS                                         | Takeda in-house          | 7500144              |
| D-PBS                                       | Gibco                    | 17-516F              |
| MycoZAP                                     | Lonza                    | VZA-2032             |
| FCS                                         | Gibco/Corning            | 10270106/3507<br>0CV |
| L-glutamine                                 | Gibco/Thermo<br>Fisher   | 25030024             |
| Penicillin- Streptomycin                    | Gibco                    | 15140122             |
| Gentamicin                                  | Gibco/Thermo<br>Fisher   | 15710049             |
| Sodium pyruvate                             | Gibco/Thermo<br>Fisher   | 11360039             |
| Non-essential amino acid solution (NEAS)    | Gibco/Thermo<br>Fisher   | 11140035             |
| Sodium bicarbonate                          | Gibco/Thermo<br>Fisher   | 25080060             |
| HEPES                                       | Gibco/Thermo<br>Fisher   | 15630056             |
| Animal Component Free cell dissociation kit | STEMCELL<br>Technologies | 5426                 |
| Accutase                                    | Corning                  | 25058049             |
| 2-DG                                        | Sigma                    | D8375-5G             |
| Triton X-100                                | Roche                    | 33981126             |
| Crystal violet powder                       | Acros Organics           | 405830250            |
| Methanol (>= 99.9%)                         | Fisher Chemical          |                      |
| Acetic acid glacial (>= 99.7%)              | Fisher Chemical          | A/0400/PB08          |
| T25 cell culture flasks                     | Corning                  | 430639               |
| Nunc™ EasYFlask™ cell culture flask T75     | Thermo<br>Scientific     | 10364131             |
| 96well plates                               | Corning                  | 3598                 |
| Deep-well plates                            | Greiner                  | 780271               |
| Costar® TC-treated 24 well plate            | Corning                  | CLS3527              |

|                                                     |                    |                              |
|-----------------------------------------------------|--------------------|------------------------------|
| MicroAmp 96-well microtiter plate                   | Applied Biosystems | I02K0 Q415                   |
| Adhesive seals for PCR microtiter plates            | Thermo Scientific  | AB1170                       |
| Nuclease free water                                 | Neofroxx           | 1058LT001                    |
| First strand cDNA Synthesis                         | Fischer Scientific | K1612                        |
| PowerTrack™ SYBR Green Master Mix                   | Applied Biosystems | A46109                       |
| ExtractMe Total RNA Kit+DNase I                     | Blirt              | EM31                         |
| Universal mouse reference RNA (spike-in control)    | Invitrogen         | QSO640 (14920)               |
| Glucose-Uptake Glo™ Assay kit                       | Promega            | J1341                        |
| Microscope                                          | Nikon              | Diaphot 200 or Eclipse TS100 |
| CASY® Cell Counter and Analyzer TT                  | Biovendis          | N.a.                         |
| QuantStudio 1Real-Time PCR Instrument               | Applied Biosystems | A40425                       |
| Nanophotometer N50-Touch                            | IMPLEN             | T51384                       |
| GENios, GENios FL and GENios Plus microplate reader | Tecan              |                              |
| GraphPad Prism                                      |                    |                              |

### Primers and oligo sequences

| Name      | Sequence (5'-3')        |
|-----------|-------------------------|
| HPRT_F    | TCAGGCAGTATAATCCAAAGATG |
| HPRT_R    | AGTCTGGCTTATATCCAACACTT |
| HRV-A54_F | CCTGTGAGCCCTCTGAAAAG    |
| HRV-A54_R | GGGGATTGCAAGTCATCTGT    |
| HRV-B14_F | GGCGCCATATCCAATGGTGT    |
| HRV-B14_R | TCCACCTGATCGAACGTCCA    |
| HRV-A1B_F | TCTACGCGCAGCAGATAATG    |
| HRV-A1B_R | ACTGCCACTGGCTCACTTCT    |
| HRV-A2_F  | TAATGTGGCAGCAGCGTTTC    |
| HRV-A2_R  | ATGTTGTACACCTGCGCAAG    |
| HRV-A89_F | GCAATGCTAAGTGCTGTCCA    |

|                            |                                                                                                                                                                             |
|----------------------------|-----------------------------------------------------------------------------------------------------------------------------------------------------------------------------|
| HRV-A89_R                  | AGGTGGAGGAGATTGGAGGT                                                                                                                                                        |
| HRV-A16_F                  | CCAAACACACCCAATACTGCTG                                                                                                                                                      |
| HRV-A16_R                  | TTGGTCCAGTTTGCTTGTGC                                                                                                                                                        |
| HRV-B14 primer<br>amplicon | GGCGCCATATCCAATGGTGTCTATGTACAAGCACTTCTGTTTCCC<br>AGGAGCGAGGTATAGGCTGTACCCACTGCCAAAAGCCTTTAACC<br>GTTATCCGCCAACCAACTACGTAACAGTTAGTACCATCTTGTTCTT<br>GACTGGACGTTTCGATCAGGTGGA |
| mZfp866_F2                 | ATC CAG GTG AGC TGA GGG AT                                                                                                                                                  |
| mZfp866_R2                 | AAC AGC TGA GCC ATC TCA CC                                                                                                                                                  |
| chimHRV-b14_RT             | ATCAGCGATGCCGAACGTATGGCGCCATATCCAATGGTGT                                                                                                                                    |
| chimHRV-b14_R1             | ATCAGCGATGCCGAACGTAT                                                                                                                                                        |
