# Supplementary material
Source: PubMed Central journal article supplement (PMC9792890)
Supplement: mmc3.pdf [file mmc3.pdf]

**Supplementary Table 2:** Summary of absolute half-maximal inhibitory concentration (IC<sub>50</sub>)

| <b>Cell type</b> | <b>Virus strain</b>    | <b>Glucose content [g/L]</b> | <b>Absolute IC<sub>50</sub> [mM]</b> |      |
|------------------|------------------------|------------------------------|--------------------------------------|------|
| HeLa Ohio cells  | RV-B14                 | 2                            | 3.44                                 |      |
|                  |                        | 1                            | 1.15                                 |      |
|                  | RV-A89                 | 2                            | 9.08                                 |      |
|                  |                        | 1                            | 2.36                                 |      |
|                  | RV-A16                 | 2                            | 9.22                                 |      |
|                  |                        | 1                            | 2.67                                 |      |
|                  | RV-A54                 | 2                            | 7.97                                 |      |
|                  |                        | 1                            | 2.08                                 |      |
|                  | RV-A2                  | 2                            | 6.08                                 |      |
|                  |                        | 1                            | 2.18                                 |      |
|                  | RV-A1B                 | 2                            | 6.87                                 |      |
|                  |                        | 1                            | 1.98                                 |      |
|                  | Undifferentiated HNECs | RV-B14                       | Not disclosed                        | 7.77 |
|                  |                        | RV-A16                       |                                      | 6.35 |
